# Supplementary material for: Diagnostic and therapeutic nanoenzymes for enhanced chemotherapy and photodynamic therapy
Source: Royal Society of Chemistry journal article supplement (doi:10.1039/d0tb02791j), 2021-01-01
Supplement: d0tb02791j1.pdf [file d0tb02791j1.pdf]

## **Diagnostic and Therapeutic Nanoenzyme for Enhanced Chemotherapy and Photodynamic Therapy**

Cong Cong<sup>1#</sup>, Yuchu He<sup>1#</sup>, Shuxian Zhao<sup>1#</sup>, Xuwu Zhang<sup>1</sup>, Lei Li<sup>1</sup>, Desong Wang<sup>1</sup>,  
Lanxiang Liu<sup>2\*</sup>, Dawei Gao<sup>1\*</sup>

1. State Key Laboratory of Metastable Materials Science and Technology, Applying Chemistry Key Lab of Hebei Province, Heavy metal deep remediation in water and resource reuse Key Lab of Hebei, Yanshan University, Qinhuangdao, 066004, P. R. China
2. Department of Magnetic Resonance Imaging, Qinhuangdao Municipal No. 1 Hospital, Qinhuangdao, P. R. China

\*Corresponding author: Prof. Dawei Gao, Lanxiang Liu, Tel: (+86)13930338376.

E-mail: [dwgao@ysu.edu.cn](mailto:dwgao@ysu.edu.cn); [liulanxiang66@sina.com](mailto:liulanxiang66@sina.com)

#: Cong Cong, Yuchu He and Shuxian Zhao have the same contribution to this work.

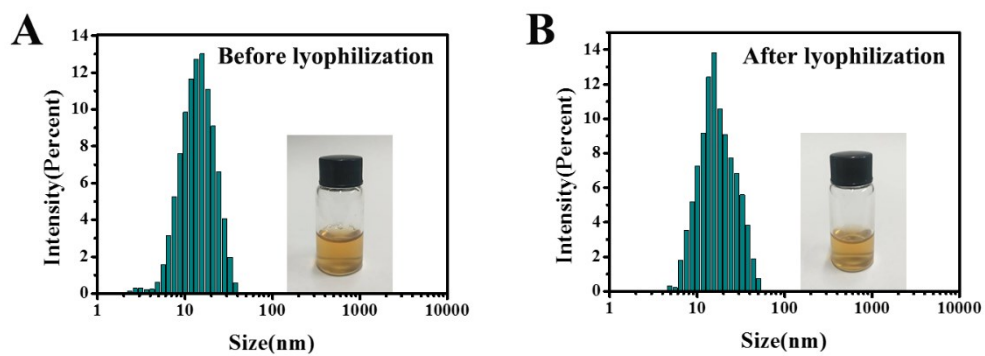

**Figure S1** Pictures and size distribution of MnO<sub>2</sub> NPs before lyophilization and after lyophilization.

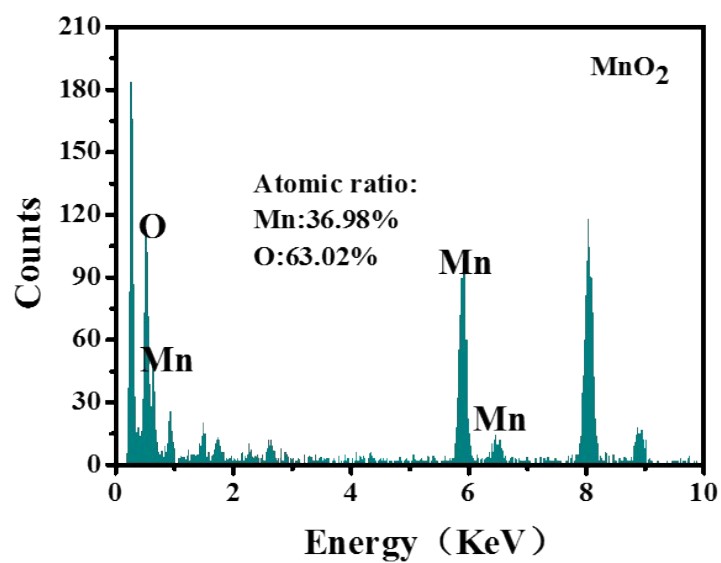

Figure S2 EDS of MnO<sub>2</sub> NPs.

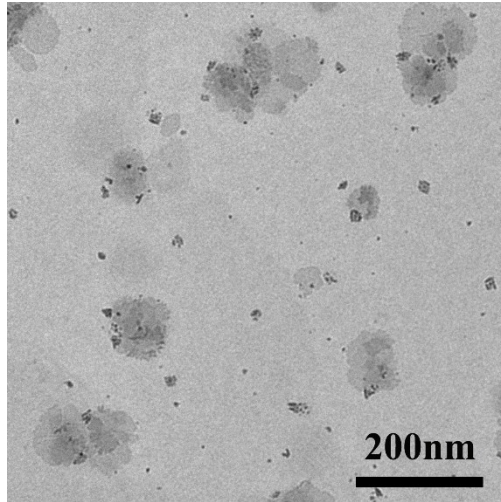

**Figure S3** TEM image of MnO<sub>2</sub>-PTX/Ce6@lips incubated at pH5.5 for 12 h.

**A**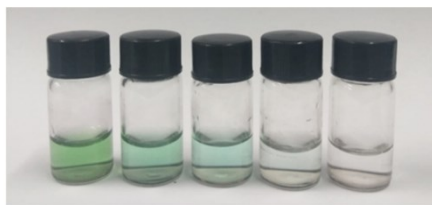**B**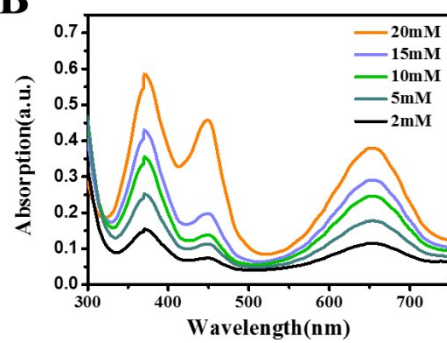

**Figure S4** Corresponding photo (A) and evolution of TMB oxidation catalysis by MnO<sub>2</sub>-PTX/Ce6@lips with different concentration (B).

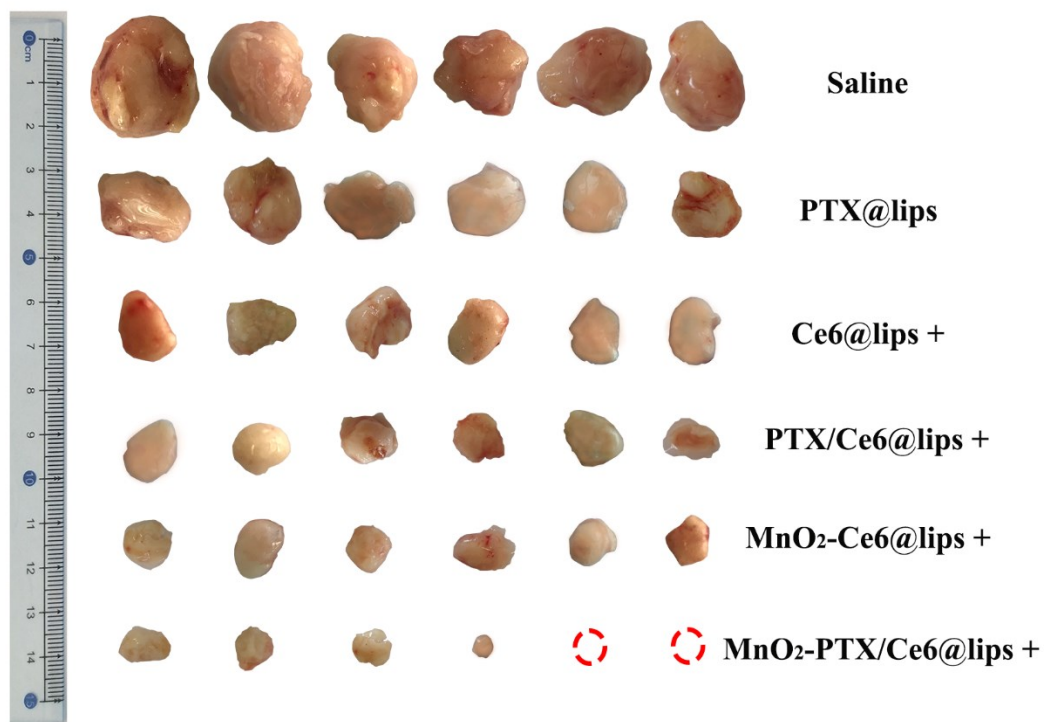

**Figure S5** Tumor pictures of U14 tumor-bearing mice after 14 days of treatments.
